# Supplementary material
Source: PubMed Central journal article supplement (PMC2903904)
Supplement: me.2010-0006_1.pdf [file me.2010-0006_1.pdf]

## **Supplemental data**

**Supplemental Figure 1.** Granulosa cell-specific AR knockout mice have normal reproductive organs. Macroscopic comparison of the female utero-genital tract at estrus between 8-9 week old GC-specific AR knockout (-/-) mice and heterozygous littermates (+/-).

**Supplemental Figure 2.** Ovaries from GC-specific AR -/- females have higher rate of apoptosis. TUNEL-stained (ApopTag Plus Peroxidase *In Situ* Apoptosis detection kit, from Chemicon International) sections of ovarian tissue from 8-9 week old GC-specific AR -/- and +/- animals (n = 2). Similar results were observed in two separate experiments.

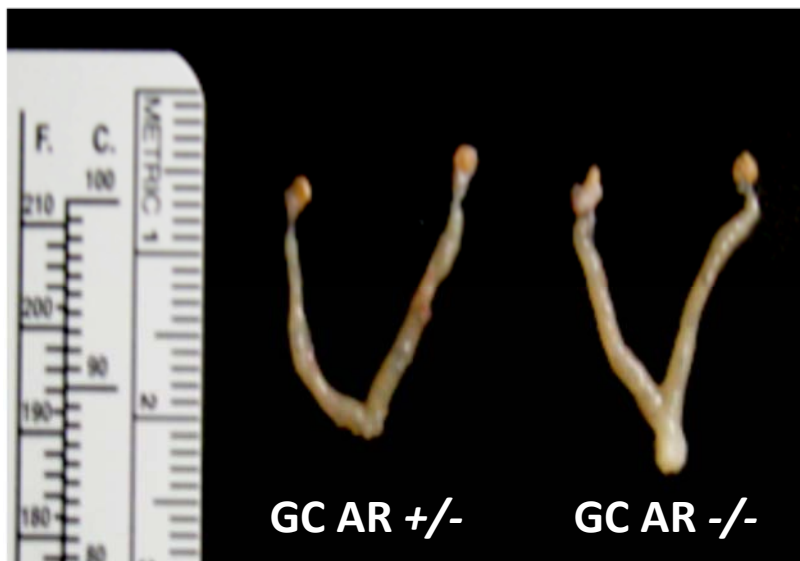

**Supplemental Fig. 1**

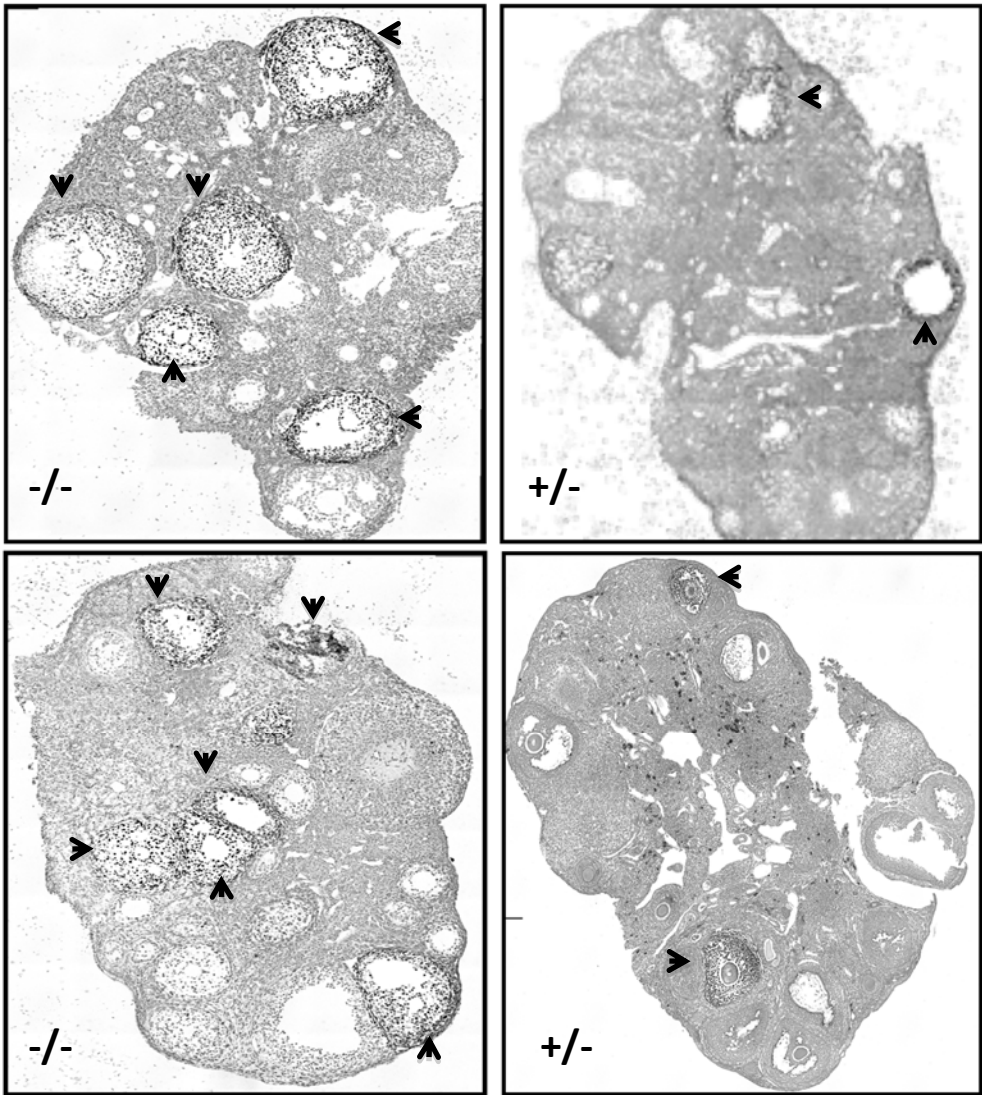

**Supplemental Fig. 2**
